# Supplementary material
Source: publisher site journal article supplement (https://www.spandidos-publications.com/8529/downloadSupplementary)
Supplement: Supplementary file 1 [file downloadSupplementary]

Table SVI. Comparative analysis with TCGA-TNBC.

| Chromosomal region  | Cohort (n=5) | TCGA-TNBC (n=139) | Observations                                                     |
|---------------------|--------------|-------------------|------------------------------------------------------------------|
| 1q23.3 (gains)      | 100% (5/5)   | 23.7% (33/139)    | Recurrent in the present cohort; moderate frequency in TCGA-TNBC |
| 8q24.3 (gains, MYC) | 100% (5/5)   | 35.3% (49/139)    | Canonical TNBC alteration; consistent with published data        |
| 6q25.2 (loss, ESR1) | 100% (5/5)   | 12.2% (17/139)    | Present in all the cohort samples; less frequent in TCGA-TNBC    |
| 20q13.33 (gains)    | 60% (3/5)    | 28.1% (39/139)    | Moderate frequency; comparable to TCGA-TNBC                      |

TCGA, The Cancer Genome Atlas; TNBC, triple negative breast cancer; ESR1, estrogen receptor 1.
